# Supplementary material
Source: PubMed Central journal article supplement (PMC2757218)

## SUPPLEMENTAL FIGURE LEGEND

**Supplemental Figure 1 A short variant BMAL2b weakly inhibits transactivation induced by BMAL1:CLOCK.** *A*, Structures of mouse BMAL2a (579 amino acids) and BMAL2b (199 amino acids) are shown schematically. Except the C-terminal residue 199 (Lys), the amino acid sequence of BMAL2b is identical to the N-terminal sequence of BMAL2a at positions 1-198. *B*, Transactivation of 2.1-kb *mPer1* promoter by BMAL1:CLOCK or BMAL2:CLOCK was examined in the presence or absence of BMAL2b. HEK293 cells were transfected with a combination 250 ng of CLOCK expression plasmid and 50 ng of FLAG-BMAL1 or FLAG-BMAL2 expression plasmid, with or without 250 ng of FLAG-BMAL2b expression plasmid. Relative luciferase activities were shown by mean fold increase from the value of the control sample that was co-transfected with 2.1-kb *mPer1* reporter and pcDNA3.1/V5-His empty vector. Data are means  $\pm$  SEM from three independent experiments (Student's *t* test, #:  $p < 0.05$ ).

**Supplemental Figure 2 Immunoblot analysis of the protein levels of BMAL1 and BMAL2 exogenously expressed in NIH3T3 cells for bioluminescence rhythm monitoring.** The lysates of NIH3T3 cells used in the experiments in Fig. 2, panel *A* (lane 1), *C* (lane 2), *D* (lane 3) and *F* (lane 4) were subjected to immunoblot analysis with affinity purified anti-BMAL1 antibody (lanes 1 and 2) and affinity purified anti-BMAL2 antibody (lanes 3 and 4) to verify high level expression of the exogenously expressed BMAL1 and BMAL2. The anti-BMAL1 and BMAL2 antibodies were raised in Wister rats (male, 7 week old; Clea Japan Inc.) against peptides of mBMAL1b (amino acid 446-479) and mBMAL2a (amino acid 18-49).

**Supplemental Figure 3 Endogenous expression of *Bmal1* and *Bmal2* mRNA in NIH3T3 cells.** To verify expression of *Bmal1* and *Bmal2* mRNA in NIH3T3 cells, reverse transcriptase-PCR (RT-PCR) was performed on total RNA extracted from NIH3T3 cells using LA-Taq polymerase (Takara Bio Inc.) with a pair of primers for BMAL1 (rmBmal1-F1 primer 5'-TGGTA CCAAC ATGCA ATGC and rmBmal1-R1 primer 5'-AGTGT CCGAG GAAGA TAGCT G) or BMAL2 (mBMAL2-F2 primer 5'-TGGTT GGATG CGAAA GAGG and mBMAL2-R4 primer 5'-AGGTT TCTCT CTTGG TGAAC C). The PCR products were subjected to 6% polyacrylamide gel electrophoresis, stained with SYBR Green I (Takara Bio Inc.), and then detected with an image analyzer FLA-2000 (Fuji Film).

**Supplemental Figure 4 Immunoblot analysis of the protein levels of BMAL1 and BMAL2 exogenously expressed in NIH3T3 cells.** The lysates of NIH3T3 cells transfected with indicated amounts of FLAG-BMAL1 or FLAG-BMAL2 expression plasmid (ng) in combination with 250 ng of CLOCK expression plasmid were subjected to immunoblot analysis with anti-FLAG antibody to verify expression levels of FLAG-tagged BMAL1 and BMAL2. The asterisks indicate non-specific bands.

**Supplemental Figure 5 Immunoblot analysis of the protein levels of BMAL1 and BMAL2.** Shown is a part of immunoblot image of BMAL1 and BMAL2 detected under the same condition as described in Fig. 4A and Fig. 5A. The asterisks indicate non-specific bands.

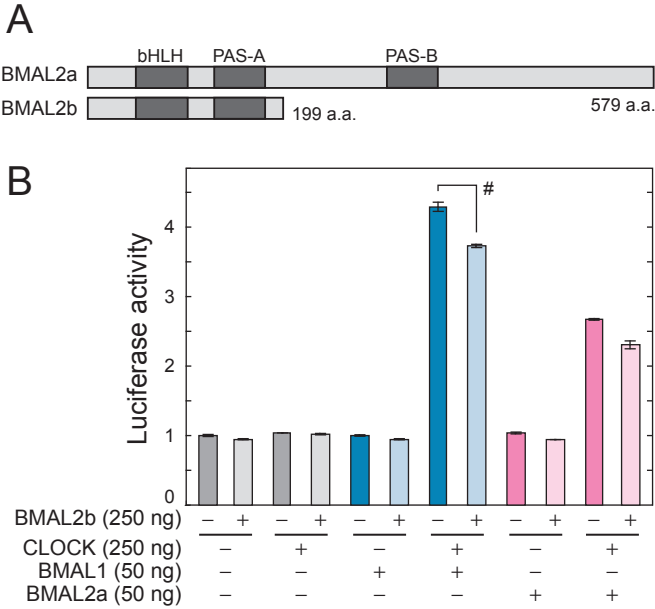

# Supplemental Figure 2

Sasaki *et al.*

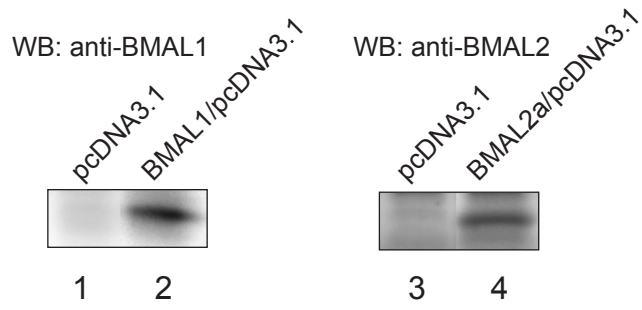

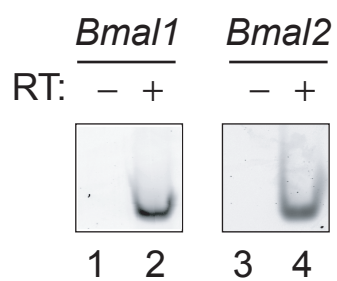

# Supplemental Figure 4

Sasaki *et al.*

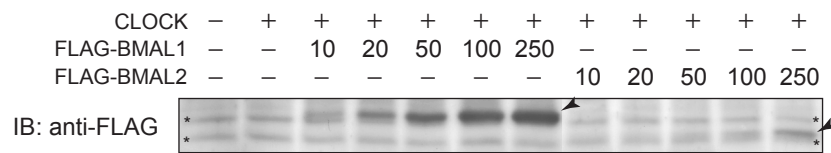

# Supplemental Figure 5

Sasaki *et al.*

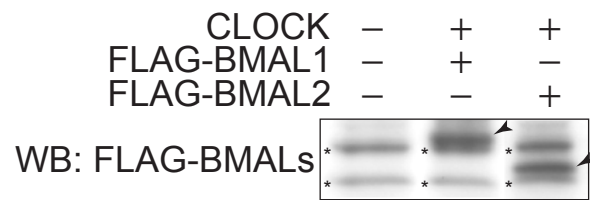

Supplement: supp_M109.040758_jbc.M109.040758-1.pdf [file supp_M109.040758_jbc.M109.040758-1.pdf]
